# Supplementary material
Source: publisher site journal article supplement (https://www.spandidos-publications.com/2246/downloadSupplementary)

Figure S1. TFF3 mRNA expression in CRC samples of patients based on age and sex. Box plots showing TFF3 mRNA expression levels in tumors based on (A) nodal status and (B) patient sex and (C) age (years). P-value was provided by UALCAN website that used two-sided Student's t-test and are indicated by asterisk (\*). P-value <0.05 was defined as statistical significant.

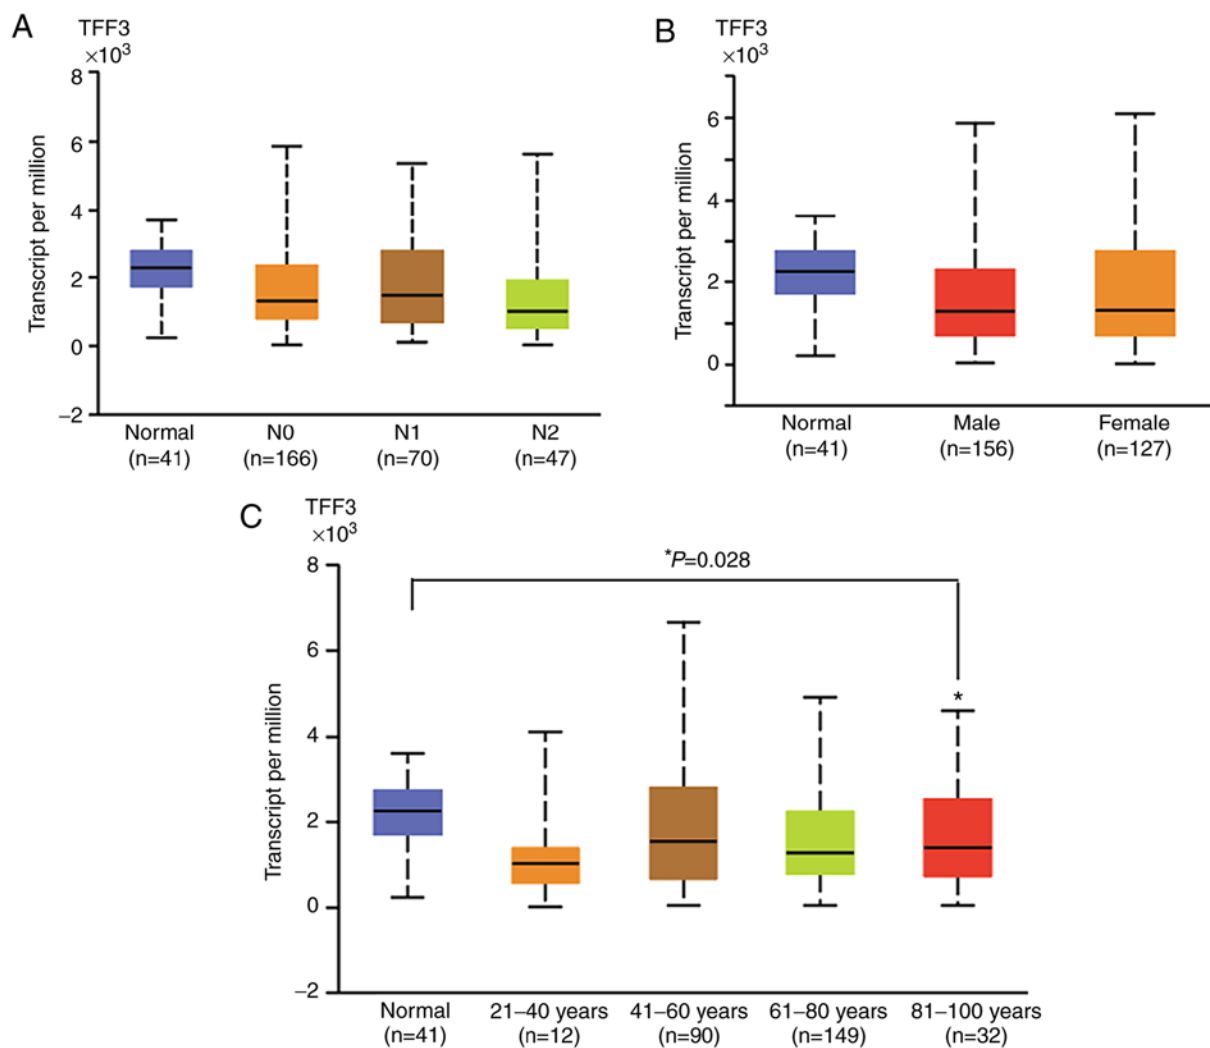

Supplement: Supplementary file 1 [file downloadSupplementary]
